# Supplementary material for: Dysfunctional tumor-infiltrating Vδ1 + T lymphocytes in microsatellite-stable colorectal cancer
Source: PubMed Central journal article supplement — Nat Commun. 2024 Aug 13;15:6949. doi: 10.1038/s41467-024-51025-1 (PMC11322529; doi:10.1038/s41467-024-51025-1), 2024-08-13
Supplement: 41467_2024_51025_MOESM1_ESM.pdf [file 41467_2024_51025_MOESM1_ESM.pdf]

## **Dysfunctional tumor-infiltrating V $\delta$ 1+ T lymphocytes in microsatellite-stable colorectal cancer**

Victoria Stary<sup>1,2,\*</sup>, Ram V. Pandey<sup>3</sup>, Julia List<sup>1</sup>, Lisa Kleissl<sup>3</sup>, Florian Deckert<sup>4</sup>, Julijan Kabiljo<sup>1</sup>, Johannes Laengle<sup>1</sup>, Vasileios Gerakopoulos<sup>1</sup>, Rudolf Oehler<sup>1</sup>, Lukas Watzke<sup>5</sup>, Matthias Farlik<sup>3</sup>, Samuel W. Lukowski<sup>6</sup>, Anne B. Vogt<sup>6</sup>, Georg Stary<sup>3,4</sup>, Hannes Stockinger<sup>2</sup>, Michael Bergmann<sup>1,#</sup>, Nina Pilat<sup>1,7,8,#</sup>

1) Medical University of Vienna, Department of General Surgery, Division of Visceral Surgery, Comprehensive Cancer Center, Vienna, Austria.

2) Medical University of Vienna, Center for Pathophysiology, Infectiology and Immunology, Institute for Hygiene and Applied Immunology.

3) Medical University of Vienna, Department of Dermatology, Vienna, Austria.

4) CeMM Research Center for Molecular Medicine of the Austrian Academy of Sciences, Vienna, Austria.

5) Medical University of Vienna, Department of Pathology, Vienna, Austria.

6) Department of Human Cancer Immunology, Boehringer Ingelheim RCV GmbH & Co KG., Dr. Boehringer Gasse 5-11, 1120 Vienna, Austria.

7) Medical University of Vienna, Department of Cardiac Surgery, Vienna, Austria.

8) Medical University of Vienna, Center for Biomedical Research and Translational Surgery, Vienna, Austria.

\* Correspondence: Victoria Stary

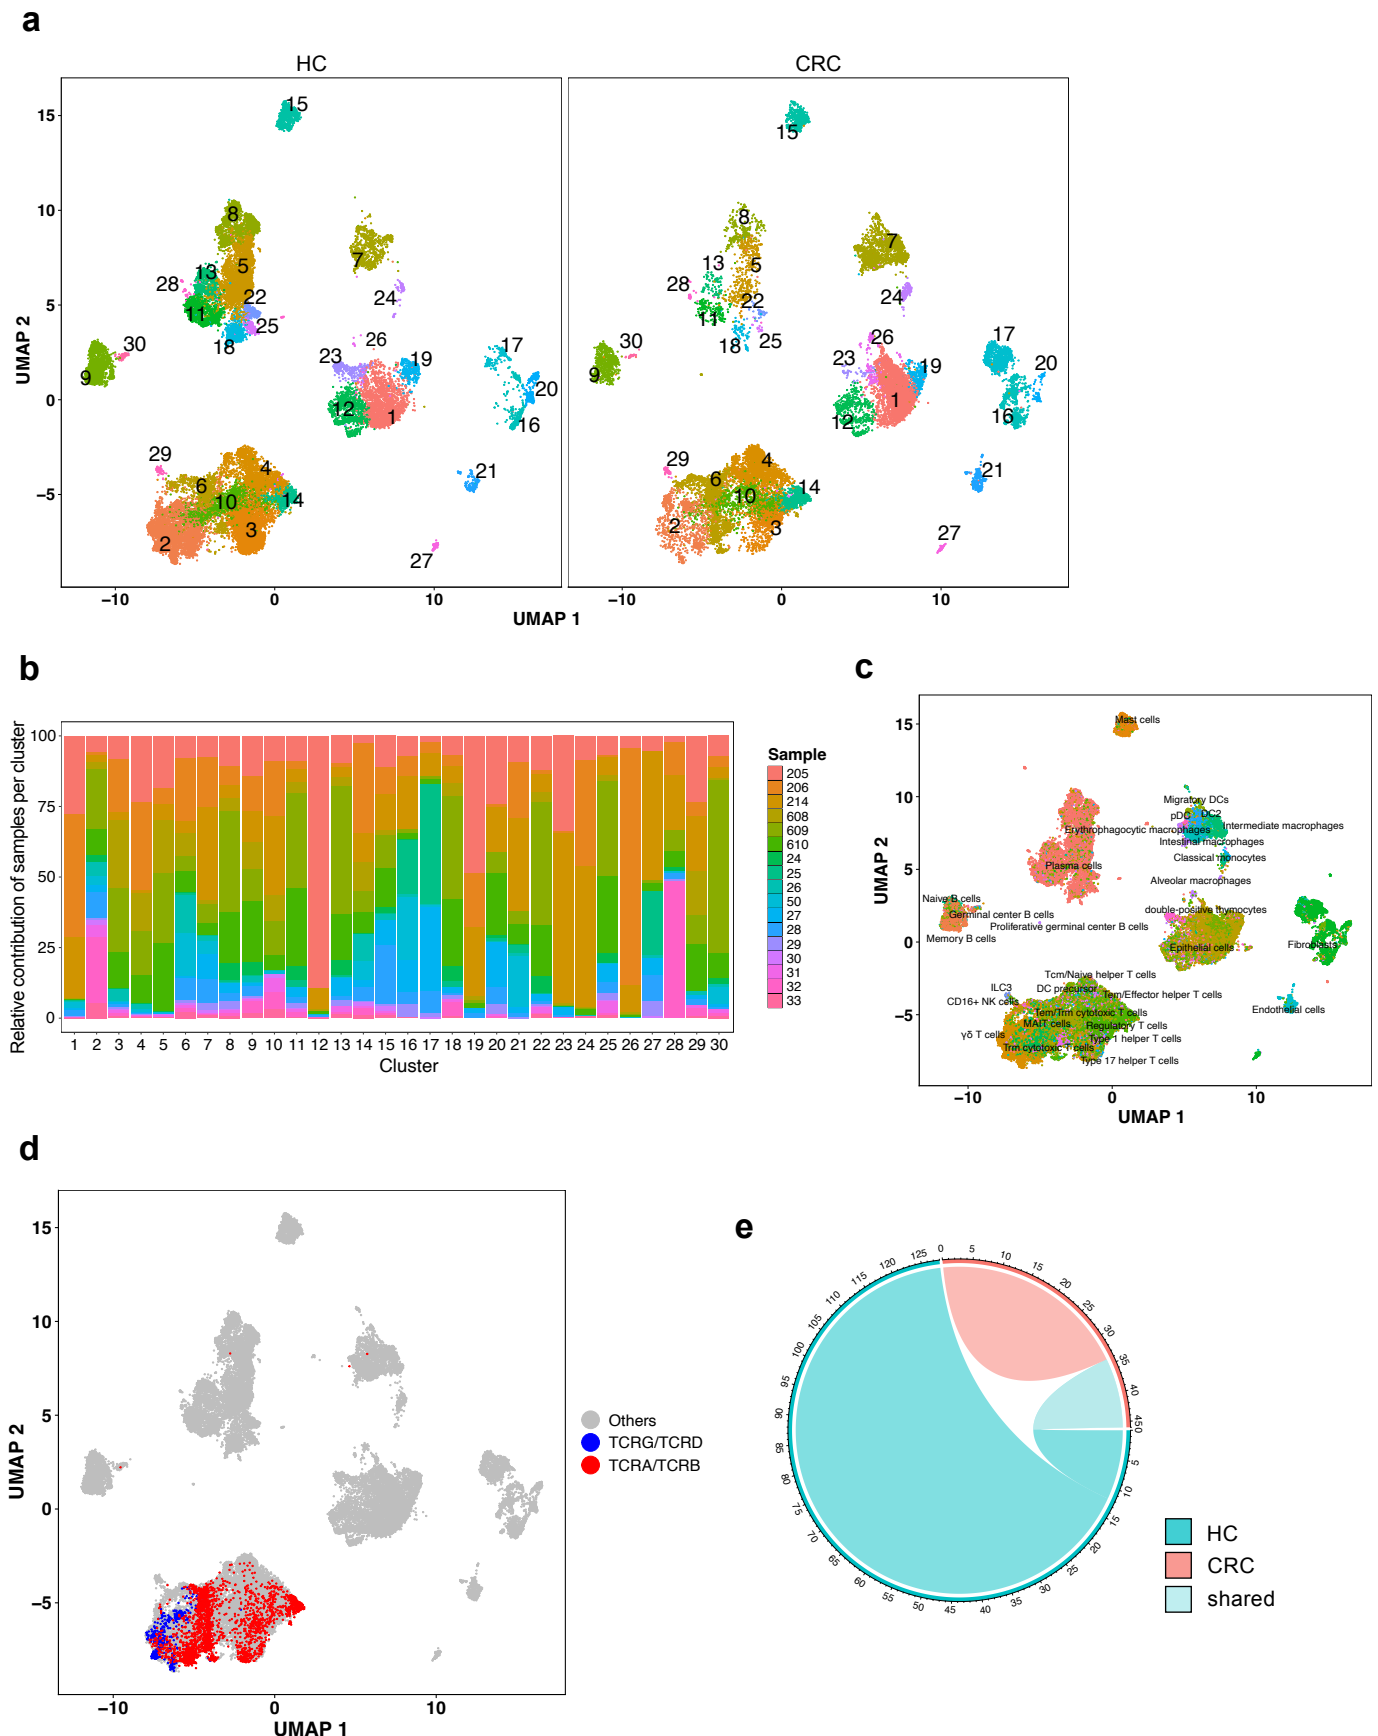

**Figure S1.**

(a) UMAP of cells in HC and CRC displayed according to the similarity of their transcriptome, resulting in 31 different color-coded clusters and cell identities. (b) Relative contribution of individual samples to each depicted cell cluster in HC and CRC. (c) Automated cell annotation using CellTypist on UMAP of HC and CRC displayed according to cell clusters. Mislabeled NK cells in fibroblast cluster were corrected using known marker genes for these cell subsets. (d) Overlay of clusters with TCR  $\alpha\beta$ - and  $\gamma\delta$ -repertoire. Cells with detectable  $\alpha\beta$ - and  $\gamma\delta$ -TCRs are colored in red and blue, respectively. (e) Circos plot demonstrating unique and shared clonotypes (light cyan) between HC (cyan) and CRC (pink).

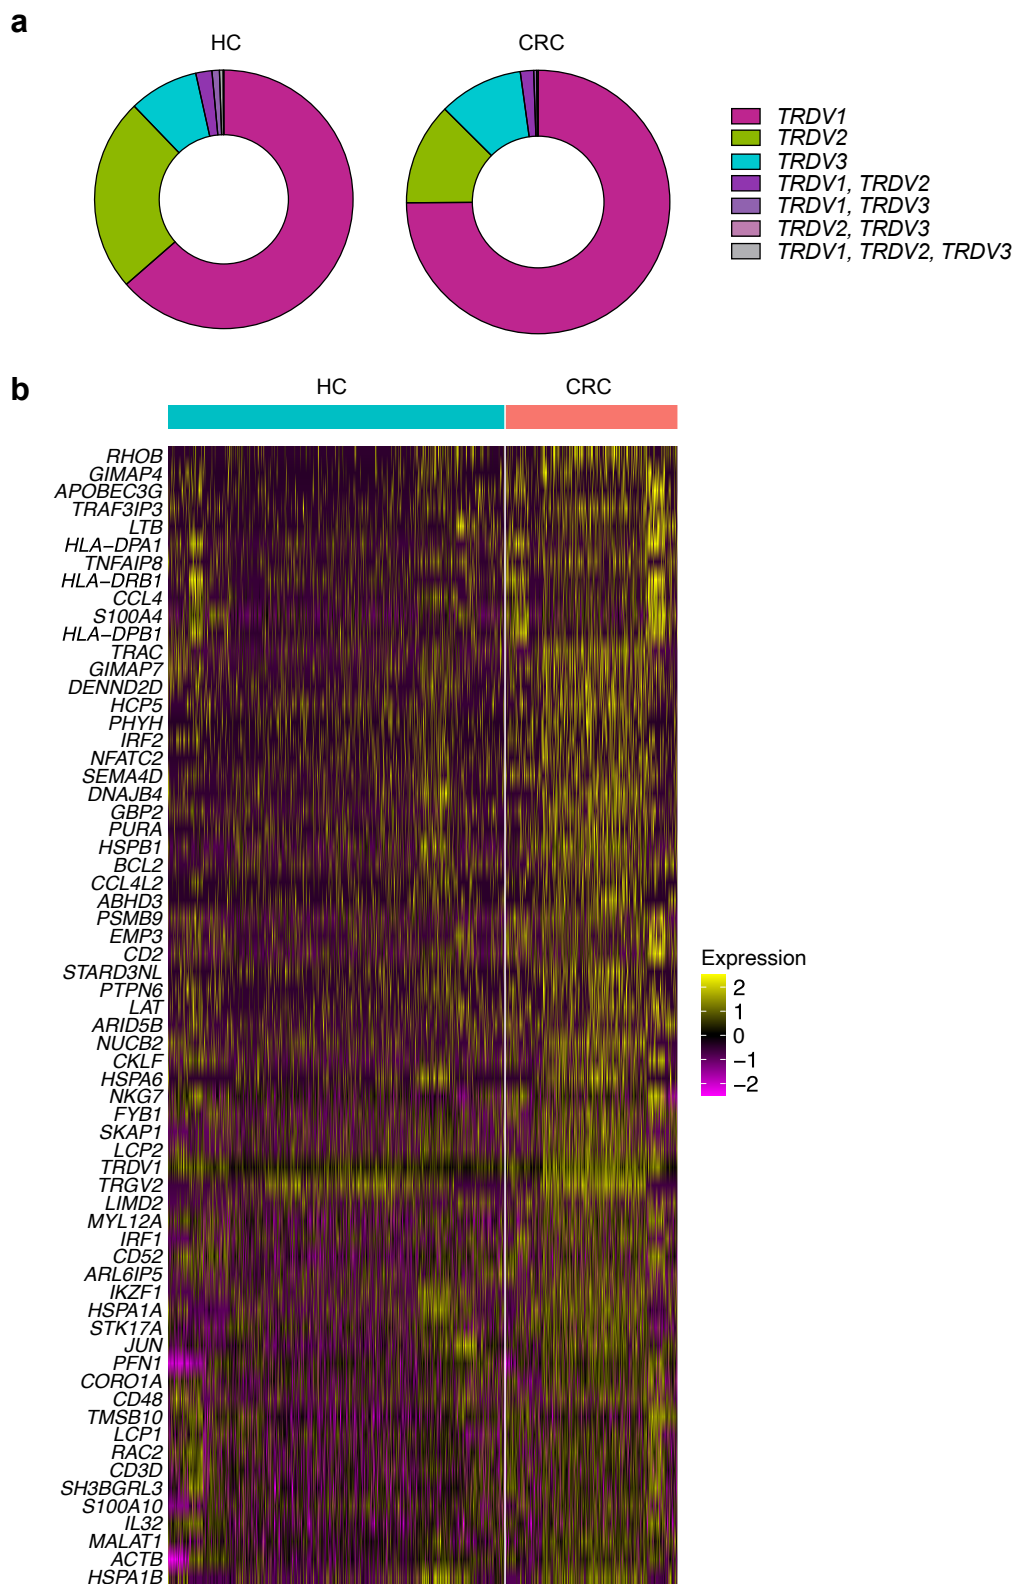

**Figure S2.**

(a) Donut charts of numbers of cells expressing *TRDV1*, *TRDV2*, *TRDV3*, doublets and triplets in HC and CRC. (b) Heatmap of differentially overexpressed genes in *TRDV1*+ cells in HC compared to CRC.

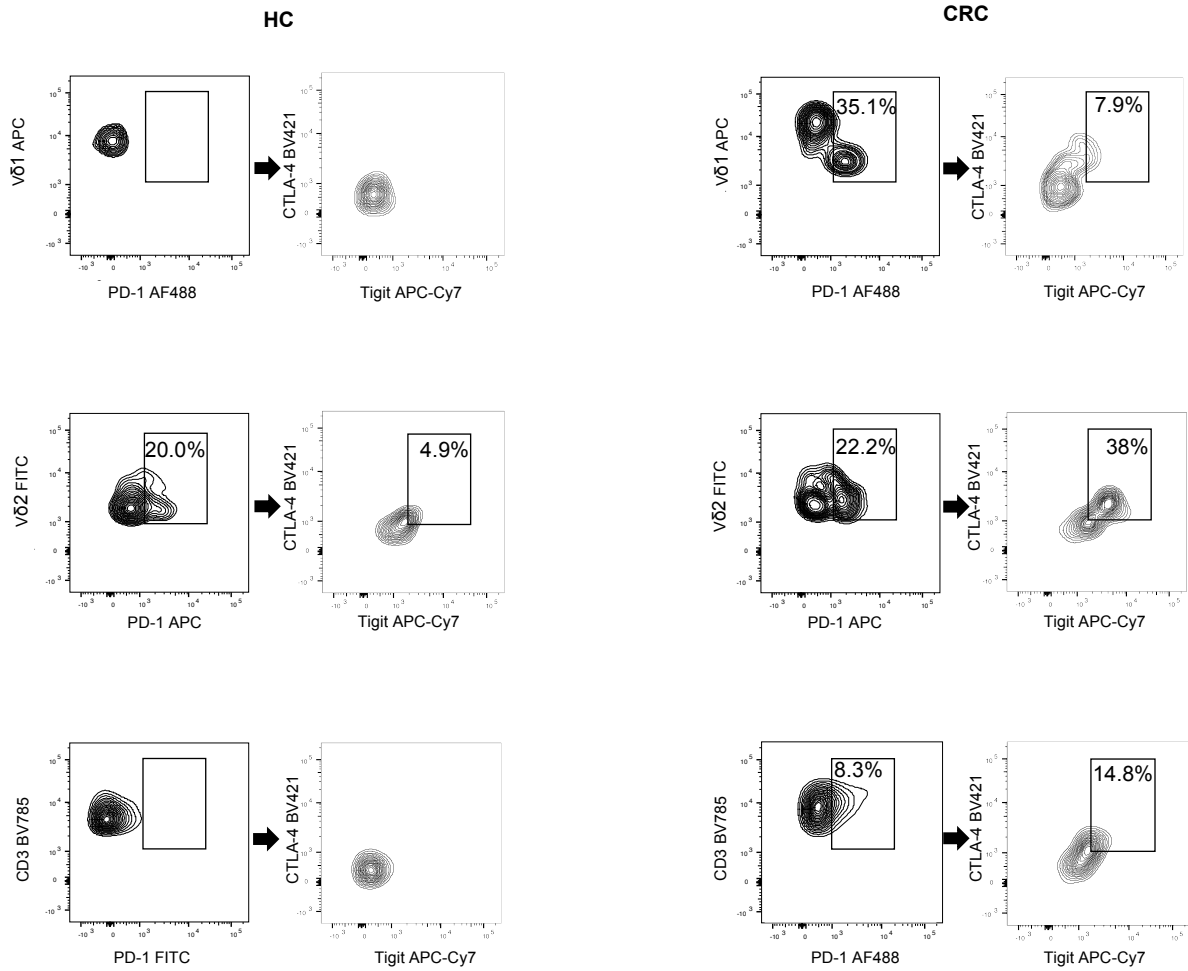

**Figure S3.**

Representative gating strategy of co-expression of CTLA-4 and TIGIT, first gated on PD-1, of Vδ1+, Vδ2+ and TCRγδ negative T cells in HC compared to CRC for Fig. 3h/3i.

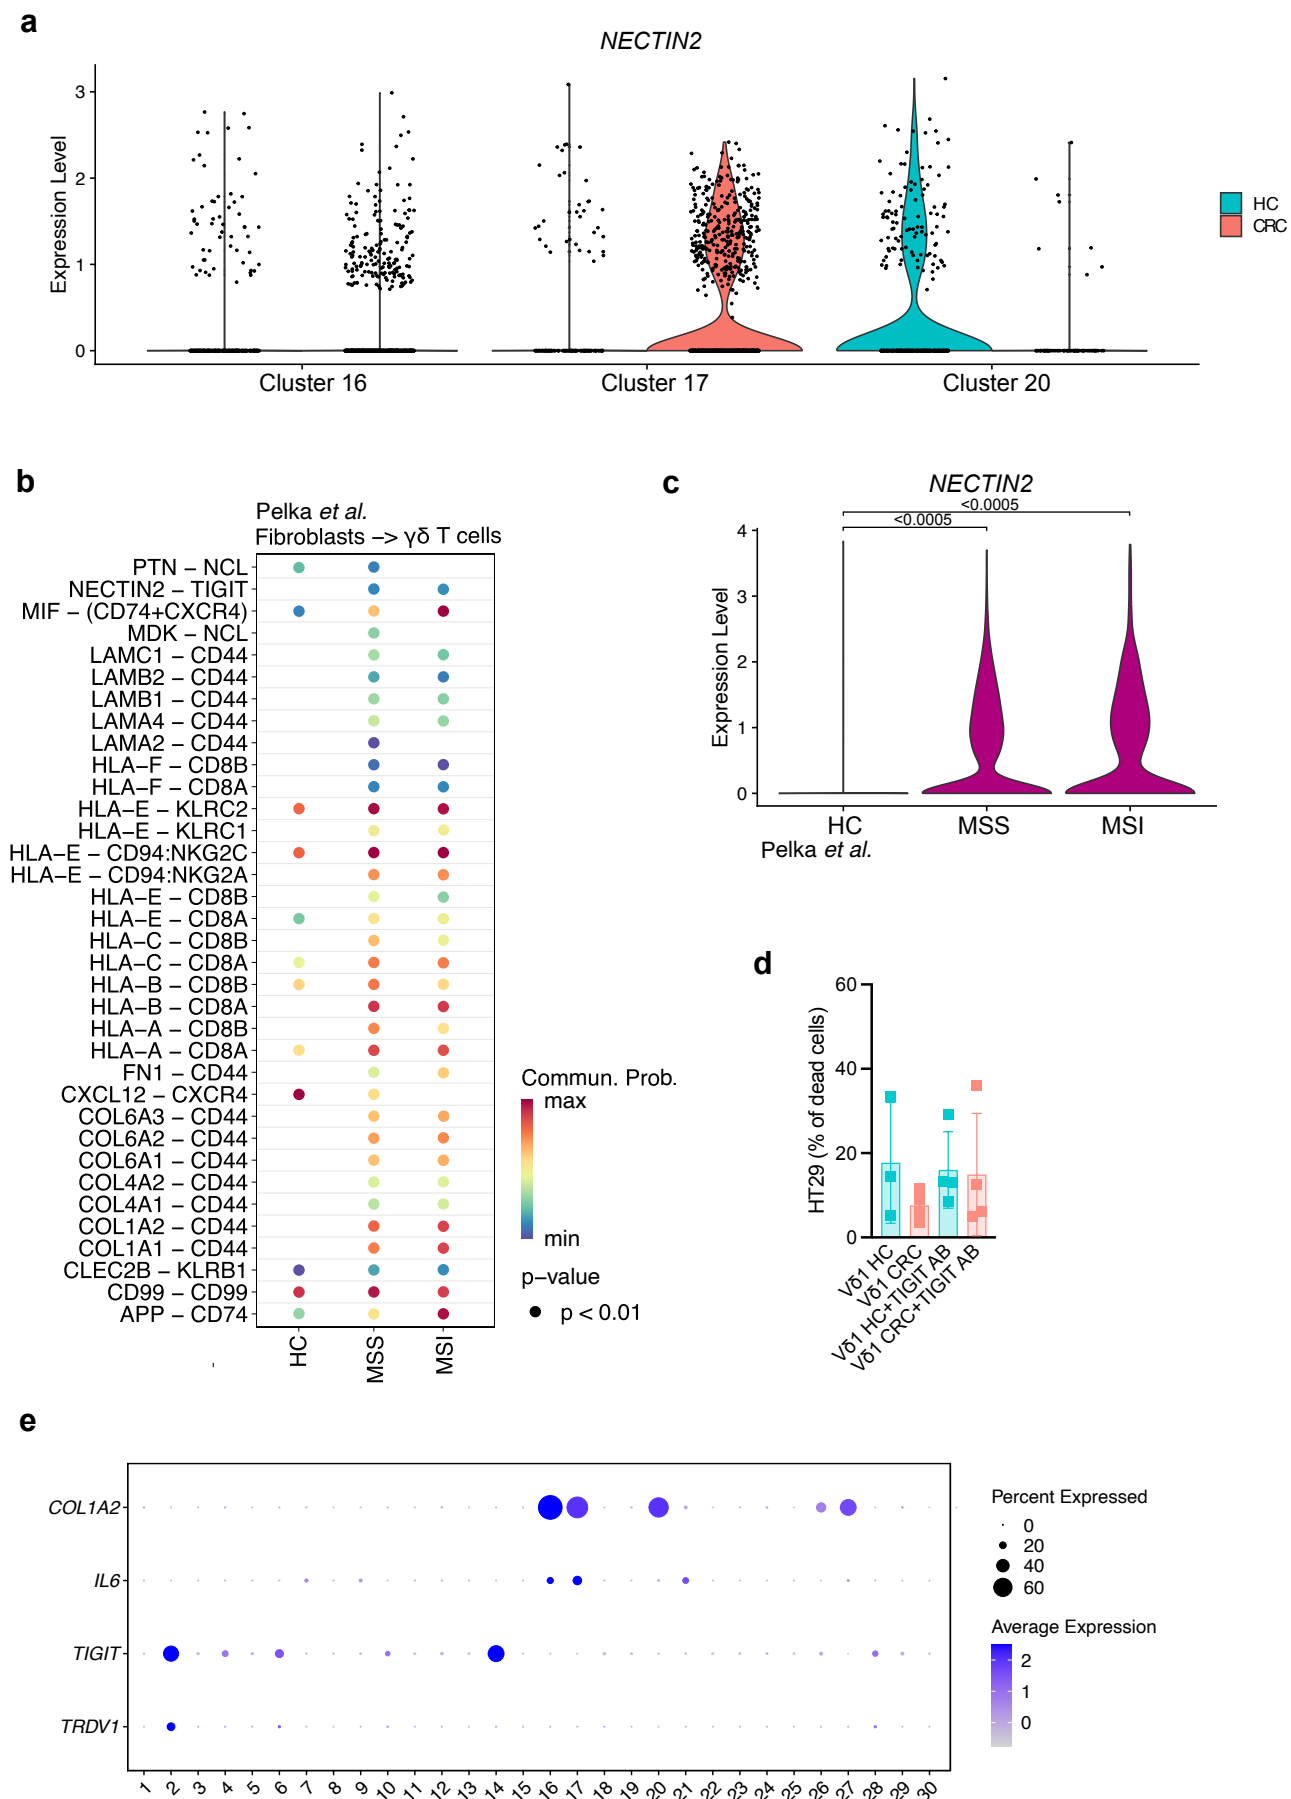

**Figure S4.**

(a) Violin plots depicting the expression of fibroblasts cluster 16, 17 and 20 between HC and CRC. (b) Significant receptor-ligand interactions of fibroblasts with  $\gamma\delta$  T cells in HC, MSS CRC and MSI CRC using the Pelka *et al.* data set<sup>20</sup>. (c) *Nectin2* expression of fibroblasts cluster in the Pelka *et al.* data set. (d) Control experiment displaying the percentage of dead HT29 cells after exclusion of baseline HT29 cell death in a killing experiment against V $\delta$ 1+ HC and V $\delta$ 1+ CRC without and with added TIGIT blocking antibody (except fibroblasts, n = 4). (e) Dot plot of average expression of depicted genes per cell cluster.

Data points and error bars represent the mean  $\pm$  SD (d); Wilcoxon Rank Sum test (b), one-way ANOVA with Fisher's LSD (c).

Table S1: Characteristics of included patients

| Sample ID | sex | age | histology | grading | T  | N  | amount N | M  | primary tumor size in cm | localisation     | 10X sequencing                                                                                     |                                                        |                        |    |     |                                                                                                               |
|-----------|-----|-----|-----------|---------|----|----|----------|----|--------------------------|------------------|----------------------------------------------------------------------------------------------------|--------------------------------------------------------|------------------------|----|-----|---------------------------------------------------------------------------------------------------------------|
|           |     |     |           |         |    |    |          |    |                          |                  | sample preparation                                                                                 | enrichment                                             | αβ-, γδ-TCR sequencing | HC | CRC | specifics                                                                                                     |
| Sample1   | f   | 54  | AC        | 3       | 3  | 0  | 0        | 0  | 4                        | sigmoid colon    |                                                                                                    |                                                        |                        |    |     |                                                                                                               |
| Sample2   | f   | 35  | AC        | 3       | 3  | 0  | 0        | 0  | 6.7                      | sigmoid colon    |                                                                                                    |                                                        |                        |    |     |                                                                                                               |
| Sample3   | f   | 50  | AC        | 2       | 3  | 0  | 0        | 0  | 4                        | rectum           |                                                                                                    |                                                        |                        |    |     |                                                                                                               |
| Sample4   | m   | 44  | AC        | 2       | 2  | 1a | 1        | 0  | 4                        | sigmoid colon    |                                                                                                    |                                                        |                        |    |     |                                                                                                               |
| Sample5   | f   | 64  | AC        | 2       | 2  | 0  | 0        | 0  | 6                        | rectum           |                                                                                                    |                                                        |                        |    |     |                                                                                                               |
| Sample6   | f   | 72  | AC        | 2       | 2  | 0  | 0        | 0  | 8                        | ascending colon  |                                                                                                    |                                                        |                        |    |     |                                                                                                               |
| Sample7   | f   | 64  | AC        | 2       | 3  | 0  | 0        | 0  | 6                        | ascending colon  |                                                                                                    |                                                        |                        |    |     |                                                                                                               |
| Sample8   | m   | 60  | AC        | 2       | 3  | 1b | 2        | 0  | 4                        | sigmoid colon    |                                                                                                    |                                                        |                        |    |     |                                                                                                               |
| Sample9   | m   | 87  | AC        | 2       | 3  | 1a | 1        | 0  | 4.5                      | ascending colon  |                                                                                                    |                                                        |                        |    |     |                                                                                                               |
| Sample10  | f   | 57  | AC        | 2       | 2  | 0  | 0        | 0  | 6                        | ascending colon  |                                                                                                    |                                                        |                        |    |     |                                                                                                               |
| Sample11  | m   | 68  | AC        | 2       | 3  | 2b | 11       | 0  | 3.5                      | sigmoid colon    |                                                                                                    |                                                        |                        |    |     |                                                                                                               |
| Sample12  | m   | 65  | AC        | 2       | 3  | 0  | 0        | 0  | 4                        | sigmoid colon    |                                                                                                    |                                                        |                        |    |     |                                                                                                               |
| Sample13  | m   | 51  | AC        | 2       | 3  | 1b | 2        | 1b | 4                        | sigmoid colon    |                                                                                                    |                                                        |                        |    |     |                                                                                                               |
| Sample14  | f   | 92  | AC        | 2       | 2  | 0  | 0        | 0  | 4                        | rectum           |                                                                                                    |                                                        |                        |    |     |                                                                                                               |
| Sample15  | f   | 42  | AC        | 2       | 1  | 1a | 1        | 1c | 4                        | rectum           |                                                                                                    |                                                        |                        |    |     |                                                                                                               |
| Sample16  | f   | 80  | AC        | 2       | 3  | 0  | 0        | 0  | 10                       | ascending colon  |                                                                                                    |                                                        |                        |    |     |                                                                                                               |
| Sample17  | m   | 57  | AC        | 2       | 4b | 1b | 3        | 1c | 12.5                     | sigmoid colon    |                                                                                                    |                                                        |                        |    |     |                                                                                                               |
| Sample18  | f   | 63  | AC        | 2       | 3  | 2a | 4        | 1a | 5                        | sigmoid colon    |                                                                                                    |                                                        |                        |    |     |                                                                                                               |
| Sample19  | m   | 75  | AC        | 2       | 4b | 0  | 0        | 0  | 3.5                      | transverse colon |                                                                                                    |                                                        |                        |    |     |                                                                                                               |
| Sample20  | m   | 66  | AC        | 3       | 3  | 0  | 0        | 0  | 0.5                      | sigmoid colon    |                                                                                                    |                                                        |                        |    |     |                                                                                                               |
| Sample21  | m   | 70  | AC        | 2       | 3  | 1b | 2        | 0  | 4                        | ascending colon  |                                                                                                    |                                                        |                        |    |     |                                                                                                               |
| Sample22  | f   | 66  | AC        | 2       | 3  | 0  | 0        | 0  | 4.5                      | ascending colon  |                                                                                                    |                                                        |                        |    |     |                                                                                                               |
| Sample23  | m   | 58  | AC        | 3       | 2  | 0  | 0        | 0  | 4                        | sigmoid colon    |                                                                                                    |                                                        |                        |    |     |                                                                                                               |
| Sample87  | f   | 56  | AC        | 3       | 3  | 2b | 15       | 0  | 4                        | rectum           |                                                                                                    |                                                        |                        |    |     |                                                                                                               |
| Sample88  | f   | 85  | AC        | 2       | 3  | 1a | 1        | 0  | 1.5                      | ascending colon  |                                                                                                    |                                                        |                        |    |     |                                                                                                               |
| Sample89  | m   | 72  | AC        | 2       | 3  | 2a | 4        | 0  | 3                        | sigmoid colon    |                                                                                                    |                                                        |                        |    |     |                                                                                                               |
| Sample92  | m   | 68  | AC        | 3       | 3  | 1a | 1        | 0  | 3                        | ascending colon  |                                                                                                    |                                                        |                        |    |     |                                                                                                               |
| Sample97  | f   | 80  | AC        | 3       | 3  | 0  | 0        | 0  | 8                        | ascending colon  |                                                                                                    |                                                        |                        |    |     |                                                                                                               |
| Sample98  | m   | 85  | AC        | 2       | 3  | 0  | 0        | 0  | 4                        | ascending colon  |                                                                                                    |                                                        |                        |    |     |                                                                                                               |
| Sample99  | m   | 76  | AC        | 3       | 3  | 0  | 0        | 0  | 2                        | ascending colon  |                                                                                                    |                                                        |                        |    |     |                                                                                                               |
| Sample100 | f   | 79  | AC        | 3       | 3  | 1c | 1        | 0  | 4                        | rectum           |                                                                                                    |                                                        |                        |    |     |                                                                                                               |
| Sample101 | m   | 67  | AC        | 2       | 3  | 1b | 2        | 0  | 3.5                      | rectum           |                                                                                                    |                                                        |                        |    |     |                                                                                                               |
| Sample108 | f   | 62  | AC        | 3       | 3  | 2b | 10       | 0  | 4                        | rectum           |                                                                                                    |                                                        |                        |    |     |                                                                                                               |
| Sample109 | m   | 31  | AC        | 2       | 4a | 0  | 0        | 0  | 4                        | ascending colon  |                                                                                                    |                                                        |                        |    |     |                                                                                                               |
| Sample110 | f   | 59  | AC        | 1       | 1  | 0  | 0        | 0  | 3.5                      | ascending colon  |                                                                                                    |                                                        |                        |    |     |                                                                                                               |
| Sample111 | M   | 76  | AC        | 2       | 4a | 1a | 1        | 0  | 4                        | sigmoid colon    |                                                                                                    |                                                        |                        |    |     |                                                                                                               |
| Sample24  | m   | 58  | AC        | 2       | 3  | 1b | 1        | 0  | 10                       | sigmoid colon    | collagenase IV (10 U/ml) + deoxyribonuclease I (10mg/ml), gentleMACS Octo dissociator, 37°C_h_TDK1 | viable CD45+/- cells                                   | X                      | X  | X   | -                                                                                                             |
| Sample25  | f   | 75  | AC        | 2       | 3  | 0  | 0        | 0  | 3.5                      | sigmoid colon    | collagenase IV (10 U/ml) + deoxyribonuclease I (10mg/ml), gentleMACS Octo dissociator, 37°C_h_TDK1 | viable CD45+/- cells                                   | X                      | X  | X   | -                                                                                                             |
| Sample26  | m   | 84  | AC        | 3       | 3  | 1b | 3        | 1c | 12                       | sigmoid colon    | collagenase IV (10 U/ml) + deoxyribonuclease I (10mg/ml), gentleMACS Octo dissociator, 37°C_h_TDK1 | viable CD45+/- cells                                   | X                      | X  | X   | -                                                                                                             |
| Sample27  | m   | 58  | AC        | 2       | 3  | 1b | 1        | 0  | 10                       | sigmoid colon    | collagenase IV (10 U/ml) + deoxyribonuclease I (10mg/ml), gentleMACS Octo dissociator, 37°C_h_TDK1 | viable CD45+/- cells                                   | X                      | X  | X   | -                                                                                                             |
| Sample28  | m   | 86  | AC        | 2       | 3  | 1a | 1        | 1a | 7                        | ascending colon  | collagenase IV (10 U/ml) + deoxyribonuclease I (10mg/ml), gentleMACS Octo dissociator, 37°C_h_TDK1 | viable CD45+/- cells                                   | X                      | X  | X   | -                                                                                                             |
| Sample29  | f   | 77  | AC        | 3       | 3  | 2a | 4        | 0  | 2.5                      | ascending colon  | collagenase IV (10 U/ml) + deoxyribonuclease I (10mg/ml), gentleMACS Octo dissociator, 37°C_h_TDK1 | viable CD45+/- cells                                   | X                      | X  | X   | -                                                                                                             |
| Sample30  | f   | 34  | AC        | 2       | 3  | 2a | 4        | 0  | 3                        | rectum           | collagenase IV (10 U/ml) + deoxyribonuclease I (10mg/ml), gentleMACS Octo dissociator, 37°C_h_TDK1 | viable 50% TCRγδ+ CD3+ cells, 50% CD45+/- cells        | X                      | X  | X   | -                                                                                                             |
| Sample31  | f   | 41  | AC        | 2       | 3  | 1b | 2        | 0  | 2.5                      | rectum           | collagenase IV (10 U/ml) + deoxyribonuclease I (10mg/ml), gentleMACS Octo dissociator, 37°C_h_TDK1 | viable 50% TCRγδ+ CD3+ cells, 50% CD45+/- cells        | -                      | X  | X   | -                                                                                                             |
| Sample32  | f   | 82  | AC        | 2       | 3  | 2a | 4        | 0  | 3                        | ascending colon  | collagenase IV (10 U/ml) + deoxyribonuclease I (10mg/ml), gentleMACS Octo dissociator, 37°C_h_TDK1 | viable 50% TCRγδ+ CD3+ cells, 50% CD45+/- cells        | -                      | X  | X   | -                                                                                                             |
| Sample33  | m   | 47  | AC        | 2       | 3  | 1c | 0        | 1a | 6                        | sigmoid colon    | collagenase IV (10 U/ml) + deoxyribonuclease I (10mg/ml), gentleMACS Octo dissociator, 37°C_h_TDK1 | viable 50% TCRγδ+ CD3+ cells, 50% CD45+/- cells        | -                      | X  | X   | -                                                                                                             |
| Sample205 | f   | 78  | AC        | 2       | 3  | 1b | 2        | 0  | 6                        | transverse colon | TDK (130-095-929, Miltenyi), gentleMACS Octo dissociator                                           | viable CD45+/- cells                                   | -                      | X  | X   | CITE-seq: Totalseq-C Human Universal Cocktail v1.0 (399905)                                                   |
| Sample206 | m   | 57  | AC        | 2       | 3  | 1b | 1        | 0  | 4                        | sigmoid colon    | TDK (130-095-929, Miltenyi), gentleMACS Octo dissociator                                           | viable CD45+/- cells                                   | -                      | X  | X   | CITE-seq: Totalseq-C Human Universal Cocktail v1.0 (399905)                                                   |
| Sample214 | m   | 38  | AC        | 2       | 3  | 1b | 2        | 0  | 7                        | rectum           | TDK (130-095-929, Miltenyi), gentleMACS Octo dissociator                                           | viable CD45+/- cells                                   | -                      | X  | X   | -                                                                                                             |
| Sample608 | m   | 59  | AC        | 2       | 3  | 2b | 20       | 0  | 4                        | sigmoid colon    | TDK (130-095-929, Miltenyi), gentleMACS Octo dissociator                                           | viable CD45+/- cells                                   | -                      | X  | -   | CITE-seq: Totalseq-C Human Universal Cocktail v1.0 (399905)                                                   |
| Sample609 | f   | 69  | AC        | 2       | 3  | 1b | 2        | 0  | 2                        | sigmoid colon    | TDK (130-095-929, Miltenyi), gentleMACS Octo dissociator                                           | viable CD45+/- cells                                   | -                      | X  | -   | CITE-seq: Totalseq-C Human Universal Cocktail v1.0 (399905)                                                   |
| Sample610 | m   | 56  | AC        | 2       | 2  | 0  | 0        | 0  | 3.5                      | ascending colon  | TDK (130-095-929, Miltenyi), gentleMACS Octo dissociator                                           | viable CD45+/- cells                                   | -                      | X  | -   | CITE-seq: Totalseq-C Human Universal Cocktail v1.0 (399905)                                                   |
| Sample50  | f   | 78  | AC        | 2       | 3  | 1b | 2        | 0  | 6                        | transverse colon | collagenase IV (1:5), 45 min 37°C                                                                  | viable 60% CD45+EpCAM-20% CD45-EpCAM+, 20% CD45-EpCAM- | X                      | -  | X   | CITE-seq: Totalseq-C Human Universal Cocktail v1.0 (399905), anti-human CD172a, CD366, Siglec10, CD206, CD258 |

Grey used for sequencing, AC; adenocarcinoma, MS; microsatellite, TDK; Tumor Dissociation Kit

Table S2: Numbers of  $\alpha\beta$ - and  $\gamma\delta$ -TCRs for each sample in HC and CRC.

| Sample       | TCR $\alpha\beta$ | TCR $\gamma\delta$ |
|--------------|-------------------|--------------------|
| Sample24 HC  | 61                | 95                 |
| Sample24 CRC | 2                 | 0                  |
| Sample25 CRC | 19                | 1                  |
| Sample26 HC  | 407               | 46                 |
| Sample26 CRC | 716               | 36                 |
| Sample27 HC  | 70                | 32                 |
| Sample27 CRC | 75                | 1                  |
| Sample28 HC  | 249               | 142                |
| Sample28 CRC | 263               | 9                  |
| Sample29 HC  | 80                | 4                  |
| Sample29 CRC | 14                | 3                  |
| Sample30 HC  | 130               | 77                 |
| Sample30 CRC | 89                | 102                |

Table S3: Antibodies used in this study.

| Antibody specificity | Fluorochrome | Clone       | Dilution | Company         | Ref. number |                                                                                                                                                                                                                                                                                                                                                                   |
|----------------------|--------------|-------------|----------|-----------------|-------------|-------------------------------------------------------------------------------------------------------------------------------------------------------------------------------------------------------------------------------------------------------------------------------------------------------------------------------------------------------------------|
| CD3                  | APC          | SK7         | 1/100    | BD Bioscience   | 345767      | <a href="https://www.bdbiosciences.com/en-at/products/reagents/flow-cytometry-reagents/clinical-diagnostics/single-color-antibodies-asr-ivd-ce-ivd/cd3-apc.345767">https://www.bdbiosciences.com/en-at/products/reagents/flow-cytometry-reagents/clinical-diagnostics/single-color-antibodies-asr-ivd-ce-ivd/cd3-apc.345767</a>                                   |
| CD3                  | BV786        | UCHT1       | 1/100    | BD Bioscience   | 565491      | <a href="https://www.bdbiosciences.com/en-us/products/reagents/flow-cytometry-reagents/research-reagents/single-color-antibodies-ruo/bv786-mouse-anti-human-cd3.565491">https://www.bdbiosciences.com/en-us/products/reagents/flow-cytometry-reagents/research-reagents/single-color-antibodies-ruo/bv786-mouse-anti-human-cd3.565491</a>                         |
| CD27                 | BV421        | M-T271      | 1/100    | BD Bioscience   | 562513      | <a href="https://www.bdbiosciences.com/en-us/products/reagents/flow-cytometry-reagents/research-reagents/single-color-antibodies-ruo/bv421-mouse-anti-human-cd27.562513">https://www.bdbiosciences.com/en-us/products/reagents/flow-cytometry-reagents/research-reagents/single-color-antibodies-ruo/bv421-mouse-anti-human-cd27.562513</a>                       |
| CD31                 | APC-Cy7      | WM59        | 1/50     | BioLegend       | 303119      | <a href="https://www.biolegend.com/de-de/products/apc-cyanine7-anti-human-cd31-antibody-6730">https://www.biolegend.com/de-de/products/apc-cyanine7-anti-human-cd31-antibody-6730</a>                                                                                                                                                                             |
| CD45                 | PE/CF594     | HI30        | 1/400    | BD Bioscience   | 562279      | <a href="https://www.bdbiosciences.com/en-at/products/reagents/flow-cytometry-reagents/research-reagents/single-color-antibodies-ruo/pe-cf594-mouse-anti-human-cd45.562279">https://www.bdbiosciences.com/en-at/products/reagents/flow-cytometry-reagents/research-reagents/single-color-antibodies-ruo/pe-cf594-mouse-anti-human-cd45.562279</a>                 |
| CD45RA               | APC-Cy7      | HI100       | 1/100    | BioLegend       | 304127      | <a href="https://www.biolegend.com/de-de/products/apc-cyanine7-anti-human-cd45ra-antibody-7056">https://www.biolegend.com/de-de/products/apc-cyanine7-anti-human-cd45ra-antibody-7056</a>                                                                                                                                                                         |
| CD90                 | PE-Cy7       | 5E10        | 1/100    | BioLegend       | 328124      | <a href="https://www.biolegend.com/de-de/products/pe-cyanine7-anti-human-cd90-thy1-antibody-8282">https://www.biolegend.com/de-de/products/pe-cyanine7-anti-human-cd90-thy1-antibody-8282</a>                                                                                                                                                                     |
| CD107a               | PE           | H4A3        | 1/40     | BioLegend       | 328607      | <a href="https://www.biolegend.com/de-de/products/pe-anti-human-cd107a-lamp-1-antibody-4967">https://www.biolegend.com/de-de/products/pe-anti-human-cd107a-lamp-1-antibody-4967</a>                                                                                                                                                                               |
| CD160                | PerCp-Cy5.5  | BY55        | 1/200    | BioLegend       | 341210      | <a href="https://www.biolegend.com/de-de/products/percp-cyanine5-5-anti-human-cd160-antibody-9082">https://www.biolegend.com/de-de/products/percp-cyanine5-5-anti-human-cd160-antibody-9082</a>                                                                                                                                                                   |
| CD244                | PerCp-Cy5.5  | C1.7        | 1/200    | BioLegend       | 329516      | <a href="https://www.biolegend.com/de-de/products/percp-cyanine5-5-anti-human-cd244-2b4-antibody-7511">https://www.biolegend.com/de-de/products/percp-cyanine5-5-anti-human-cd244-2b4-antibody-7511</a>                                                                                                                                                           |
| CTLA-4               | BV421        | BNI3        | 1/50     | BioLegend       | 369605      | <a href="https://www.biolegend.com/de-de/products/brilliant-violet-421-anti-human-cd152-ctla-4-antibody-13159">https://www.biolegend.com/de-de/products/brilliant-violet-421-anti-human-cd152-ctla-4-antibody-13159</a>                                                                                                                                           |
| EpCAM                | BV421        | CO17-1A     | 1/50     | BioLegend       | 369821      | <a href="https://www.biolegend.com/de-de/products/brilliant-violet-421-anti-human-cd326-epcam-antibody-14320">https://www.biolegend.com/de-de/products/brilliant-violet-421-anti-human-cd326-epcam-antibody-14320</a>                                                                                                                                             |
| FasL                 | PE-Vio770    | NOK-1       | 1/100    | Miltenyi Biotec | 130-104-270 | <a href="https://www.miltenyibiotec.com/US-en/products/cd178-antibody-anti-human-nok-1.html#conjugate=pe-vio-770:size=100-tests-in-200-ul">https://www.miltenyibiotec.com/US-en/products/cd178-antibody-anti-human-nok-1.html#conjugate=pe-vio-770:size=100-tests-in-200-ul</a>                                                                                   |
| GranzymeB            | BV421        | GB11        | 1/75     | BD Bioscience   | 563389      | <a href="https://www.bdbiosciences.com/en-us/products/reagents/flow-cytometry-reagents/research-reagents/single-color-antibodies-ruo/bv421-mouse-anti-human-granzyme-b.563389">https://www.bdbiosciences.com/en-us/products/reagents/flow-cytometry-reagents/research-reagents/single-color-antibodies-ruo/bv421-mouse-anti-human-granzyme-b.563389</a>           |
| IFN $\gamma$         | V450         | B27         | 1/75     | BD Bioscience   | 560372      | <a href="https://www.bdbiosciences.com/en-us/products/reagents/flow-cytometry-reagents/research-reagents/single-color-antibodies-ruo/v450-mouse-anti-human-ifn.560372">https://www.bdbiosciences.com/en-us/products/reagents/flow-cytometry-reagents/research-reagents/single-color-antibodies-ruo/v450-mouse-anti-human-ifn.560372</a>                           |
| Ki-67                | PE-Cy7       | 20Raj1      | 1/100    | BD Bioscience   | 561283      | <a href="https://www.bdbiosciences.com/en-us/products/reagents/flow-cytometry-reagents/research-reagents/single-color-antibodies-ruo/pe-cy-7-mouse-anti-ki-67.561283">https://www.bdbiosciences.com/en-us/products/reagents/flow-cytometry-reagents/research-reagents/single-color-antibodies-ruo/pe-cy-7-mouse-anti-ki-67.561283</a>                             |
| LAG-3                | PE-Cy7       | 11G3C65     | 1/50     | BioLegend       | 369310      | <a href="https://www.biolegend.com/de-de/products/pe-cyanine7-anti-human-cd223-lag-3-antibody-13551">https://www.biolegend.com/de-de/products/pe-cyanine7-anti-human-cd223-lag-3-antibody-13551</a>                                                                                                                                                               |
| PD1                  | APC          | EH12.2H7    | 1/100    | BioLegend       | 329908      | <a href="https://www.biolegend.com/de-de/products/apc-anti-human-cd279-pd-1-antibody-4413">https://www.biolegend.com/de-de/products/apc-anti-human-cd279-pd-1-antibody-4413</a>                                                                                                                                                                                   |
| PD1                  | FITC         | EH12.2H7    | 1/100    | BioLegend       | 329903      | <a href="https://www.biolegend.com/de-de/products/fitc-anti-human-cd279-pd-1-antibody-4411">https://www.biolegend.com/de-de/products/fitc-anti-human-cd279-pd-1-antibody-4411</a>                                                                                                                                                                                 |
| Perforin             | PerCp-Cy5.5  | $\delta$ G9 | 1/75     | BD Bioscience   | 563762      | <a href="https://www.bdbiosciences.com/en-at/products/reagents/flow-cytometry-reagents/research-reagents/single-color-antibodies-ruo/percp-cy-5-5-mouse-anti-human-perforin.563762">https://www.bdbiosciences.com/en-at/products/reagents/flow-cytometry-reagents/research-reagents/single-color-antibodies-ruo/percp-cy-5-5-mouse-anti-human-perforin.563762</a> |
| TCR $\gamma\delta$   | PE           | B1          | 1/150    | BioLegend       | 331210      | <a href="https://www.biolegend.com/de-de/products/pe-anti-human-tcr-gamma-delta-antibody-4553">https://www.biolegend.com/de-de/products/pe-anti-human-tcr-gamma-delta-antibody-4553</a>                                                                                                                                                                           |
| TCR V $\delta$ 1     | APC          | REA173      | 1/150    | Miltenyi Biotec | 130-118-968 | <a href="https://www.miltenyibiotec.com/US-en/products/tcr-vd1-antibody-anti-human-reafinity-rea173.html#conjugate=apc:size=100-tests-in-200-ul">https://www.miltenyibiotec.com/US-en/products/tcr-vd1-antibody-anti-human-reafinity-rea173.html#conjugate=apc:size=100-tests-in-200-ul</a>                                                                       |



Table S3: Antibodies used in this study.

| Antibody specificity | Fluorochrome | Clone   | Dilution | Company       | Ref. number |                                                                                                                                                                                                                                                                                                                                                 |
|----------------------|--------------|---------|----------|---------------|-------------|-------------------------------------------------------------------------------------------------------------------------------------------------------------------------------------------------------------------------------------------------------------------------------------------------------------------------------------------------|
| TCR V $\delta$ 2     | FITC         | B6      | 1/80     | BD Bioscience | 555738      | <a href="https://www.bdbiosciences.com/en-us/products/reagents/flow-cytometry-reagents/research-reagents/single-color-antibodies-ruo/fic-mouse-anti-human-v-2-cr.555738">https://www.bdbiosciences.com/en-us/products/reagents/flow-cytometry-reagents/research-reagents/single-color-antibodies-ruo/fic-mouse-anti-human-v-2-cr.555738</a>     |
| TIGIT                | APC-Cy7      | A15153G | 1/50     | BioLegend     | 372707      | <a href="https://www.biolegend.com/de/products/apc-fire-750-anti-human-tigit-vstm3-antibody-13740">https://www.biolegend.com/de/products/apc-fire-750-anti-human-tigit-vstm3-antibody-13740</a>                                                                                                                                                 |
| TIGIT                | Blocking     | A15153A | 1/5000   | BioLegend     | 613703      | <a href="https://www.biolegend.com/de/products/ultra-leaf-purified-anti-human-tigit-antibody-18510?GroupID=GROUP28">https://www.biolegend.com/de/products/ultra-leaf-purified-anti-human-tigit-antibody-18510?GroupID=GROUP28</a>                                                                                                               |
| Tim3                 | APC-Cy7      | F38-2EZ | 1/50     | BioLegend     | 345026      | <a href="https://www.biolegend.com/de/products/apc-cyanine7-anti-human-cd366-tim-3-antibody-11928">https://www.biolegend.com/de/products/apc-cyanine7-anti-human-cd366-tim-3-antibody-11928</a>                                                                                                                                                 |
| TNF- $\alpha$        | PE-Cy7       | MAb11   | 1/75     | BD Bioscience | 560678      | <a href="https://www.bdbiosciences.com/en-us/products/reagents/flow-cytometry-reagents/research-reagents/single-color-antibodies-ruo/pe-cy-7-mouse-anti-human-tnf.560678">https://www.bdbiosciences.com/en-us/products/reagents/flow-cytometry-reagents/research-reagents/single-color-antibodies-ruo/pe-cy-7-mouse-anti-human-tnf.560678</a>   |
| TRAIL                | Biotin       | RIK-2   | 1/100    | BD Bioscience | 550431      | <a href="https://www.bdbiosciences.com/en-us/products/reagents/flow-cytometry-reagents/research-reagents/single-color-antibodies-ruo/biotin-mouse-anti-human-cd253.550431">https://www.bdbiosciences.com/en-us/products/reagents/flow-cytometry-reagents/research-reagents/single-color-antibodies-ruo/biotin-mouse-anti-human-cd253.550431</a> |
