# Supplementary material for: Dysfunctional tumor-infiltrating Vδ1 + T lymphocytes in microsatellite-stable colorectal cancer
Source: PubMed Central journal article supplement — Nat Commun. 2024 Aug 13;15:6949. doi: 10.1038/s41467-024-51025-1 (PMC11322529; doi:10.1038/s41467-024-51025-1), 2024-08-13
Supplement: 41467_2024_51025_MOESM3_ESM.pdf [file 41467_2024_51025_MOESM3_ESM.pdf]

## Reporting Summary

Nature Portfolio wishes to improve the reproducibility of the work that we publish. This form provides structure for consistency and transparency in reporting. For further information on Nature Portfolio policies, see our [Editorial Policies](#) and the [Editorial Policy Checklist](#).

### Statistics

For all statistical analyses, confirm that the following items are present in the figure legend, table legend, main text, or Methods section.

n/a | Confirmed

- |                                     |                                     |                                                                                                                                                                                                                                                            |
|-------------------------------------|-------------------------------------|------------------------------------------------------------------------------------------------------------------------------------------------------------------------------------------------------------------------------------------------------------|
| <input type="checkbox"/>            | <input checked="" type="checkbox"/> | The exact sample size ( $n$ ) for each experimental group/condition, given as a discrete number and unit of measurement                                                                                                                                    |
| <input type="checkbox"/>            | <input checked="" type="checkbox"/> | A statement on whether measurements were taken from distinct samples or whether the same sample was measured repeatedly                                                                                                                                    |
| <input type="checkbox"/>            | <input checked="" type="checkbox"/> | The statistical test(s) used AND whether they are one- or two-sided<br><i>Only common tests should be described solely by name; describe more complex techniques in the Methods section.</i>                                                               |
| <input type="checkbox"/>            | <input checked="" type="checkbox"/> | A description of all covariates tested                                                                                                                                                                                                                     |
| <input type="checkbox"/>            | <input checked="" type="checkbox"/> | A description of any assumptions or corrections, such as tests of normality and adjustment for multiple comparisons                                                                                                                                        |
| <input type="checkbox"/>            | <input checked="" type="checkbox"/> | A full description of the statistical parameters including central tendency (e.g. means) or other basic estimates (e.g. regression coefficient) AND variation (e.g. standard deviation) or associated estimates of uncertainty (e.g. confidence intervals) |
| <input type="checkbox"/>            | <input checked="" type="checkbox"/> | For null hypothesis testing, the test statistic (e.g. $F$ , $t$ , $r$ ) with confidence intervals, effect sizes, degrees of freedom and $P$ value noted<br><i>Give <math>P</math> values as exact values whenever suitable.</i>                            |
| <input checked="" type="checkbox"/> | <input type="checkbox"/>            | For Bayesian analysis, information on the choice of priors and Markov chain Monte Carlo settings                                                                                                                                                           |
| <input checked="" type="checkbox"/> | <input type="checkbox"/>            | For hierarchical and complex designs, identification of the appropriate level for tests and full reporting of outcomes                                                                                                                                     |
| <input type="checkbox"/>            | <input checked="" type="checkbox"/> | Estimates of effect sizes (e.g. Cohen's $d$ , Pearson's $r$ ), indicating how they were calculated                                                                                                                                                         |

*Our web collection on [statistics for biologists](#) contains articles on many of the points above.*

### Software and code

Policy information about [availability of computer code](#)

Data collection

Data analysis

For manuscripts utilizing custom algorithms or software that are central to the research but not yet described in published literature, software must be made available to editors and reviewers. We strongly encourage code deposition in a community repository (e.g. GitHub). See the Nature Portfolio [guidelines for submitting code & software](#) for further information.

### Data

Policy information about [availability of data](#)

All manuscripts must include a [data availability statement](#). This statement should provide the following information, where applicable:

- Accession codes, unique identifiers, or web links for publicly available datasets
- A description of any restrictions on data availability
- For clinical datasets or third party data, please ensure that the statement adheres to our [policy](#)

All sequencing data generated in this study was deposited under the accession code GSE236384. Reviewer can use the following token to access the data:  
uxexusyjkptnmn

## Research involving human participants, their data, or biological material

Policy information about studies with [human participants or human data](#). See also policy information about [sex, gender \(identity/presentation\), and sexual orientation](#) and [race, ethnicity and racism](#).

|                                                                    |                                                                                                                                                                                                                                                                                                                              |
|--------------------------------------------------------------------|------------------------------------------------------------------------------------------------------------------------------------------------------------------------------------------------------------------------------------------------------------------------------------------------------------------------------|
| Reporting on sex and gender                                        | We report sex as self-reported attribute in the Supplementary Table 1 for each participant. We did not perform sex-based analyses due to small sample sizes.                                                                                                                                                                 |
| Reporting on race, ethnicity, or other socially relevant groupings | We did not apply socially relevant grouping on participants.                                                                                                                                                                                                                                                                 |
| Population characteristics                                         | Male and female adults with MSS treatment naive adenocarcinoma of the colon or rectum (see Supplementary Table 1).                                                                                                                                                                                                           |
| Recruitment                                                        | Patients of the Division of Visceral Surgery, Department of General Surgery, Medical University of Vienna, scheduled for surgical resection for adenocarcinoma of the colon or rectum with no history of radiation therapy or cytoablative treatment were enrolled into the study after submitting written informed consent. |
| Ethics oversight                                                   | Local Ethics Committee of the Medical University of Vienna, Vienna, Austria                                                                                                                                                                                                                                                  |

Note that full information on the approval of the study protocol must also be provided in the manuscript.

## Field-specific reporting

Please select the one below that is the best fit for your research. If you are not sure, read the appropriate sections before making your selection.

Life sciences  Behavioural & social sciences  Ecological, evolutionary & environmental sciences

For a reference copy of the document with all sections, see [nature.com/documents/nr-reporting-summary-flat.pdf](https://www.nature.com/documents/nr-reporting-summary-flat.pdf)

## Life sciences study design

All studies must disclose on these points even when the disclosure is negative.

|                 |                                                                                                                                                                 |
|-----------------|-----------------------------------------------------------------------------------------------------------------------------------------------------------------|
| Sample size     | Due to the explorative character of the study the sample size was not pre-calculated. Wherever applicable, two-sided t-tests yielded 80% power at alpha = 0.05. |
| Data exclusions | Samples were excluded if history revealed radio or chemotherapy, inflammatory bowel diseases and/or microsatellite instability.                                 |
| Replication     | All attempts of replication were successful.                                                                                                                    |
| Randomization   | Not relevant, no randomized grouping was performed for this study.                                                                                              |
| Blinding        | Investigators were blinded for data analysis. Codes were allocated to patient samples instead of phenotype.                                                     |

## Reporting for specific materials, systems and methods

We require information from authors about some types of materials, experimental systems and methods used in many studies. Here, indicate whether each material, system or method listed is relevant to your study. If you are not sure if a list item applies to your research, read the appropriate section before selecting a response.

### Materials & experimental systems

| n/a                                 | Involved in the study                                     |
|-------------------------------------|-----------------------------------------------------------|
| <input type="checkbox"/>            | <input checked="" type="checkbox"/> Antibodies            |
| <input type="checkbox"/>            | <input checked="" type="checkbox"/> Eukaryotic cell lines |
| <input checked="" type="checkbox"/> | <input type="checkbox"/> Palaeontology and archaeology    |
| <input checked="" type="checkbox"/> | <input type="checkbox"/> Animals and other organisms      |
| <input checked="" type="checkbox"/> | <input type="checkbox"/> Clinical data                    |
| <input checked="" type="checkbox"/> | <input type="checkbox"/> Dual use research of concern     |
| <input checked="" type="checkbox"/> | <input type="checkbox"/> Plants                           |

### Methods

| n/a                                 | Involved in the study                              |
|-------------------------------------|----------------------------------------------------|
| <input checked="" type="checkbox"/> | <input type="checkbox"/> ChIP-seq                  |
| <input type="checkbox"/>            | <input checked="" type="checkbox"/> Flow cytometry |
| <input checked="" type="checkbox"/> | <input type="checkbox"/> MRI-based neuroimaging    |

## Antibodies

### Antibodies used

CD3 APC SK7 BD Bioscience 345767  
 CD3 BV786 UCHT1 BD Bioscience 565491  
 CD27 BV421 M-T271 BD Bioscience 562513  
 CD31 APC-Cy7 WM59 BioLegend 303119  
 CD45 PE/CF594 HI30 BD Bioscience 562279  
 CD45RA APC-Cy7 HI100 BioLegend 304127  
 CD90 PE-Cy7 5,00E+10 BioLegend 328124  
 CD107a PE H4A3 BioLegend 328607  
 CD160 PerCp-Cy5.5 BY55 BioLegend 341210  
 CD244 PerCp-Cy5.5 C1.7 BioLegend 329516  
 CTLA-4 BV421 BNI3 BioLegend 369605  
 EpCAM BV421 CO17-1A BioLegend 369821  
 FasL PE-Vio770 NOK-1 Miltenyi Biotec 130-104-270  
 GranzymeB BV421 GB11 BD Bioscience 563389  
 IFN $\gamma$  V450 B27 BD Bioscience 560372  
 Ki-67 PE-Cy7 20Raj1 BD Bioscience 561283  
 LAG-3 PE-Cy7 11G3C65 BioLegend 369310  
 PD1 APC EH12.2H7 BioLegend 329908  
 PD1 FITC EH12.2H7 BioLegend 329903  
 Perforin PerCp-Cy5.5  $\delta$ G9 BD Bioscience 563762  
 TCR $\gamma\delta$  PE B1 BioLegend 331210  
 TCR V $\delta$ 1 APC REA173 Miltenyi Biotec 130-118-968  
 TCR V $\delta$ 2 FITC B6 BD Bioscience 555738  
 TIGIT APC-Cy7 A15153G BioLegend 372707  
 TIGIT Blocking A15153A BioLegend 613703  
 Tim3 APC-Cy7 F38-2EZ BioLegend 345026  
 TNF- $\alpha$  PE-Cy7 MAb11 BD Bioscience 560678  
 TRAIL Biotin RIK-2 BD Bioscience 550431

### Validation

For each antibody signals were compared to isotype and unstained controls to estimate nonspecific binding of primary antibodies.

## Eukaryotic cell lines

Policy information about [cell lines and Sex and Gender in Research](#)

### Cell line source(s)

HT29, SW480

### Authentication

We purchased the cell lines from American Type Culture Collection (ATCC) and used cells in low passages.

### Mycoplasma contamination

All cell lines tested negative for mycoplasma contamination using PCR Mycoplasma test kit (Biological Industries; 2070020).

### Commonly misidentified lines (See [ICLAC](#) register)

n/a

## Flow Cytometry

### Plots

Confirm that:

- The axis labels state the marker and fluorochrome used (e.g. CD4-FITC).
- The axis scales are clearly visible. Include numbers along axes only for bottom left plot of group (a 'group' is an analysis of identical markers).
- All plots are contour plots with outliers or pseudocolor plots.
- A numerical value for number of cells or percentage (with statistics) is provided.

### Methodology

#### Sample preparation

Human colon tissue, HC and CRC, was cut into small pieces using a sterile scalpel. Phosphate buffered saline (PBS, Gibco) with 10% fetal bovine serum (FBS, Gibco) was used to rinse the tissue. Human colon samples were digested with medium, consisting of plain RPMI 1640 medium (Gibco) supplemented with collagenase IV (10 U/ml, Sigma-Aldrich) and deoxyribonuclease I (10mg/ml, DNase, Sigma-Aldrich). Digestion was performed using a digestion machine (gentleMACS Octo dissociator with heaters, Miltenyi) with the preset 37°C\_h\_TDK1 protocol. The cell suspension was passed through a 70 $\mu$ m cell strainer using the backside of a syringe. RPMI 1640 medium supplemented with 10% FBS was used to rinse the strainers.

|                           |                                                                                                                                                                                                                                                                                                                                                                                                                                           |
|---------------------------|-------------------------------------------------------------------------------------------------------------------------------------------------------------------------------------------------------------------------------------------------------------------------------------------------------------------------------------------------------------------------------------------------------------------------------------------|
| Instrument                | Sample acquisition and cell sorting was performed on a FACSAria III (BD Biosciences) with FACSDiva Software.                                                                                                                                                                                                                                                                                                                              |
| Software                  | The acquired samples were analyzed with FlowJo software (v10.8).                                                                                                                                                                                                                                                                                                                                                                          |
| Cell population abundance | Sorting purity was determined using BD FACS Diva software (Accudrop application); using 4-way purity sorting strategy, cell purity was determined at >99%;                                                                                                                                                                                                                                                                                |
| Gating strategy           | Lymphocyte population was gated in SSCA/FSCA, single cells were gated i) in FSC-W/FSC-H and ii) in SSC-W/SSC-H; single cells were gated on live, CD45+; from this gate, T lymphocytes were determined as SSCA lo, CD3+ cells. Further T cell subpopulations were gated from this (e.g. cytokines). Generally, populations >10 <sup>3</sup> were considered positive; n-1 control stainings showed <0.1% positive cells above this cutoff. |

Tick this box to confirm that a figure exemplifying the gating strategy is provided in the Supplementary Information.
